# Supplementary material for: Sub-10 nm Nanoparticle Detection Using Multi-Technique-Based Micro-Raman Spectroscopy
Source: MDPI journal article supplement (doi:10.3390/polym15244644), 2023-12-08
Supplement: s1 [file s1]

# Sub-10 nm Nanoparticle Detection Using Multi-Technique based micro-Raman Spectroscopy

## Supplementary material

**Table S1.** PS-NPs diameters and polydispersion indexes (PDI) as informed by the manufacturer and corresponding standard deviation for the diameters.

| nominal diameter (nm) | mean diameter (nm) | PDI   | SD (nm) |
|-----------------------|--------------------|-------|---------|
| 500                   | 582                | 0,053 | 134     |
| 200                   | 248                | 0,021 | 36      |
| 100                   | 98                 | 0,022 | 14      |
| 50                    | 50                 | 0,063 | 12      |
| 25                    | 28,9               | 0,109 | 9,5     |

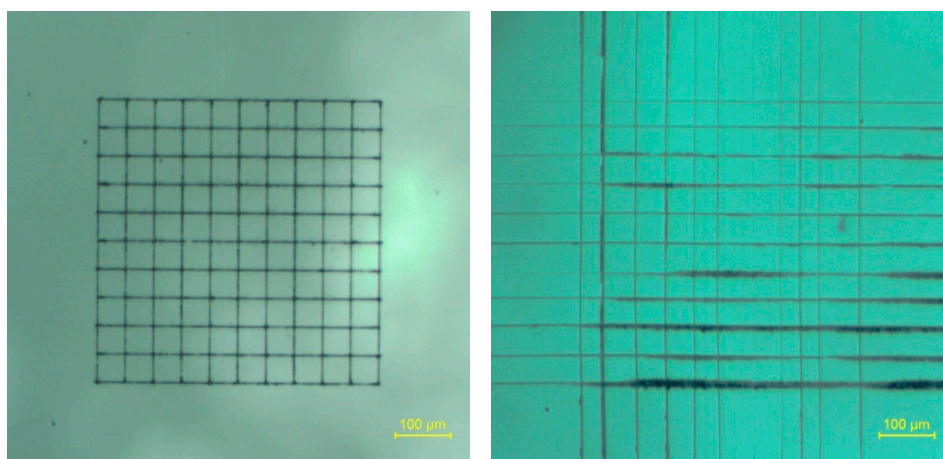

**Figure S1.** Quartz substrate containing laser marked (a) and diamond scratched (b) grids.

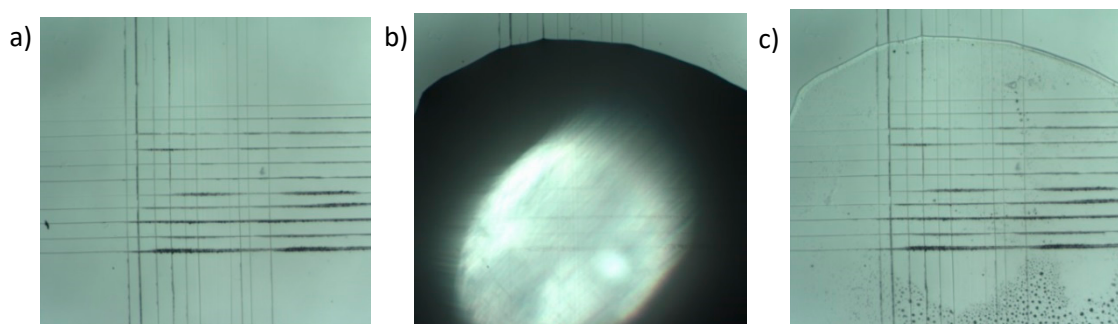

**Figure S2.** Images of NPs deposition over the diamond scratched grid. (a) before deposition, (b) after deposition and (c) after dried.

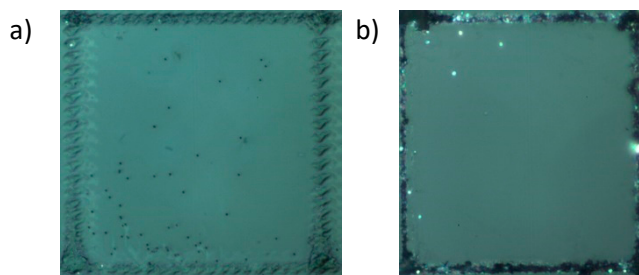

**Figure S3.** 50 x50  $\mu\text{m}^2$  laser marked grid after (a) 200 nm + 25 nm PS deposition and (b) 400 nm + 20 nm  $\text{TiO}_2$  NPs deposition.

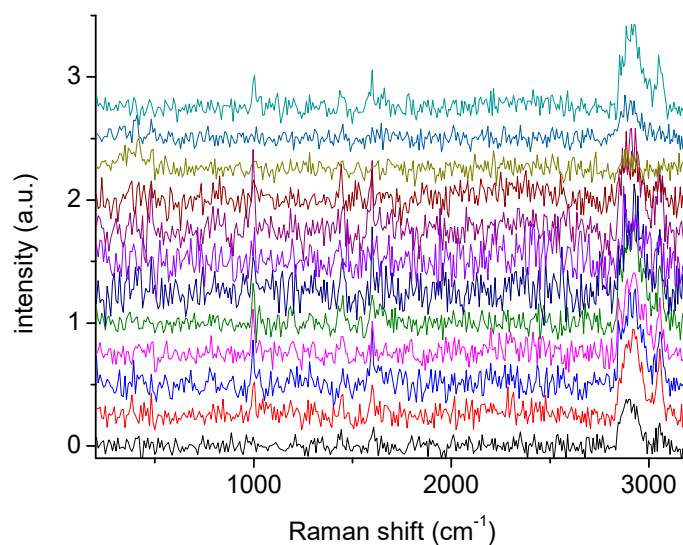

**Figure S4.** Measured 1 min spectra from the 25 nm PS-NP.

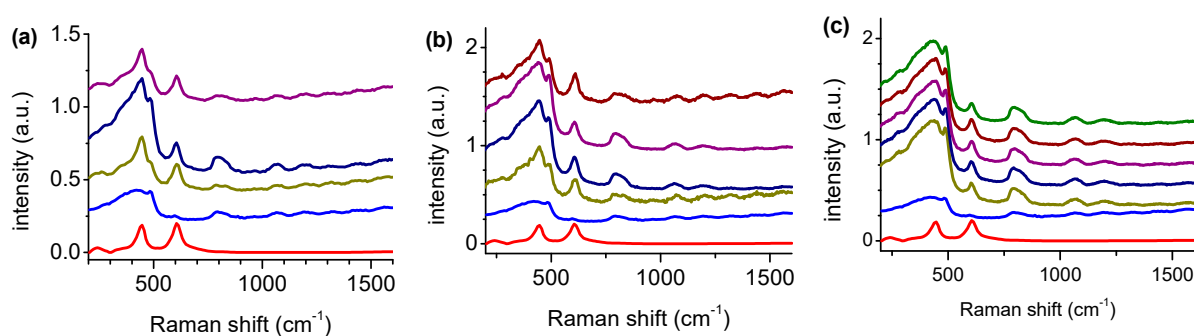

**Figure S5.** Raw spectra obtained from  $\text{TiO}_2$  NPs. (a) Three individual raw Raman spectra acquired with 3 accumulations of 20 s each for the 18 nm TNP; (b) Four raw Raman spectra measured acquired with 10 accumulations of 60 s each for the 12 nm TNP; (c) Five raw Raman spectra measured for measured acquired with 10 accumulations of 60 s each for the 9 nm TNP. Blue and red lines are the reference spectra form fused silica substrate and rutile, respectively.
